# Supplementary material for: A phase II dose evaluation pilot feasibility randomized controlled trial of cholecalciferol in critically ill children with vitamin D deficiency (VITdAL-PICU study)
Source: Springer Nature journal article supplement (doi:10.1186/s12887-023-04205-9), 2023-08-14
Supplement: MOESM3 [file 25921372]

### Additional File 3: Research Sample 25(OH)D Results

#### Plasma 25(OH)D concentrations in nmol/L among those enrolled in Canada

| Timepoint          | Treatment (n=33) |                      | Placebo (n=16) |                     |
|--------------------|------------------|----------------------|----------------|---------------------|
|                    | <i>n</i>         | median (IQR) nmol/L  | <i>n</i>       | median (IQR) nmol/L |
| Screening          | 33               | 37.9 (32.0, 42.0)    | 16             | 36.5 (34.6, 41.5)   |
| Enrollment         | 16               | 54.9 (42.8, 71.7)    | 8              | 38.0 (33.5, 55.9)   |
| Day 1              | 23               | 160.6 (106.8, 215.0) | 13             | 40.3 (33.8, 48.6)   |
| Day 2              | 22               | 198.0 (113.8, 265.1) | 13             | 47.2 (37.2, 58.6)   |
| Day 3              | 25               | 176.1 (127.7, 249.8) | 12             | 44.0 (36.7, 67.4)   |
| Day 7              | 26               | 198.9 (128.8, 226.5) | 8              | 44.8 (42.5, 65.4)   |
| Hospital Discharge | 17               | 161.0 (156.8, 224.5) | 4              | 39.4 (36.4, 49.1)   |

#### Plasma 25(OH)D concentrations in nmol/L among those enrolled outside of Canada

| Timepoint          | Treatment (n=7) |                      | Placebo (n=3) |                     |
|--------------------|-----------------|----------------------|---------------|---------------------|
|                    | <i>n</i>        | median (IQR) nmol/L  | <i>n</i>      | median (IQR) nmol/L |
| Screening          | 7               | 20.2 (20.1, 27.0)    | 3             | 27.5 (26.9, 34.6)   |
| Enrollment         | 1               | 73.5                 | 1             | 63.6                |
| Day 1              | 6               | 112.8 (74.8, 134.4)  | 3             | 36.6 (33.0, 43.2)   |
| Day 2              | 5               | 220.7 (181.4, 256.5) | 2             | 38.0 (33.2, 42.9)   |
| Day 3              | 5               | 241.4 (164.7, 386.4) | 2             | 39.6 (35.9, 43.3)   |
| Day 7              | 6               | 182.7 (70.5, 319.6)  | 3             | 39.6 (36.2, 46.4)   |
| Hospital Discharge | 1               | 297.2                | 0             | NA (NA, NA)         |
