# Supplementary material for: A phase II dose evaluation pilot feasibility randomized controlled trial of cholecalciferol in critically ill children with vitamin D deficiency (VITdAL-PICU study)
Source: Springer Nature journal article supplement (doi:10.1186/s12887-023-04205-9), 2023-08-14
Supplement: MOESM4 [file 25921372]

**Additional File 4: Definition of vitamin D related adverse events monitored in real-time through lab values from the clinical laboratory, and safety procedures for elevated lab values in the VITdAL-PICU Pilot Study**

| <b>Adverse Event</b>                             | <b>Study Thresholds</b>                   | <b>Definition</b>                                                                                                                                   | <b>Safety Procedures</b>                                                                                                                   |             |
|--------------------------------------------------|-------------------------------------------|-----------------------------------------------------------------------------------------------------------------------------------------------------|--------------------------------------------------------------------------------------------------------------------------------------------|-------------|
| <b>Hypercalcemia</b>                             | Ionized calcium level:<br>>1.40 mmol/L    | Persistent hypercalcemia for >24 hours in absence of calcium administration                                                                         | Endocrinology consult, managed clinically as determined by Endocrinology                                                                   |             |
|                                                  | >1.45 mmol/L for children <8 weeks of age |                                                                                                                                                     |                                                                                                                                            |             |
| <b>Hypercalciuria (calcium:creatinine ratio)</b> | Age-based thresholds:                     | Hypercalciuria, as determined by a calcium:creatinine ratio above the study threshold in two sequential urine samples (excluding enrolment sample). | Nephrology consult, case reviewed to determine need for repeat urine sample, abdominal ultrasound and/or clinical management by Nephrology |             |
|                                                  | <1                                        |                                                                                                                                                     |                                                                                                                                            | 2.2 mol/mol |
|                                                  | 1-2                                       |                                                                                                                                                     |                                                                                                                                            | 1.5 mol/mol |
|                                                  | 2-3                                       |                                                                                                                                                     |                                                                                                                                            | 1.4 mol/mol |
|                                                  | 3-5                                       |                                                                                                                                                     |                                                                                                                                            | 1.1 mol/mol |
|                                                  | 5-7                                       |                                                                                                                                                     |                                                                                                                                            | 0.8 mol/mol |
| 7-17                                             | 0.7 mol/mol                               |                                                                                                                                                     |                                                                                                                                            |             |
| <b>Hypervitaminosis D</b>                        | Plasma 25(OH)D concentration >200 nmol/L  | Plasma 25(OH)D concentration >200 nmol/L in Day 7 sample                                                                                            | Endocrinology consult, managed clinically as determined by Endocrinology                                                                   |             |

*From: McNally D, Amrein K, O'Hearn K, Fergusson D, Geier P, Henderson M, Khamessan A, Lawson ML, McIntyre L, Redpath S, Weiler HA, Menon K; Canadian Critical Care Trials Group. Study protocol for a phase II dose evaluation randomized controlled trial of cholecalciferol in critically ill children with vitamin D deficiency (VITdAL-PICU study). Pilot Feasibility Stud. 2017 Dec 8;3:70. doi: 10.1186/s40814-017-0214-z. PMID: 29234503; PMCID: PMC5721544.*
