# Supplementary material for: A phase II dose evaluation pilot feasibility randomized controlled trial of cholecalciferol in critically ill children with vitamin D deficiency (VITdAL-PICU study)
Source: Springer Nature journal article supplement (doi:10.1186/s12887-023-04205-9), 2023-08-14
Supplement: MOESM5 [file 25921372]

**Additional File 5: Summary of patients who received two doses of study drug and were excluded from the study analysis**

| Characteristic                                                                 | Participant          |         |           |                      |                    |           |         |
|--------------------------------------------------------------------------------|----------------------|---------|-----------|----------------------|--------------------|-----------|---------|
|                                                                                | 01-001               | 01-061  | 01-062    | 01-063               | 01-066             | 01-069    | 01-070  |
| <b>Age (mo.)</b>                                                               | 0.2                  | 176.2   | 1.1       | 13.3                 | 1.8                | 147.9     | 3.1     |
| <b>Weight (kg)</b>                                                             | 3.8                  | 195.0   | 4.9       | 9.4                  | 11.1               | 54.6      | 16.2    |
| <b>Sex</b>                                                                     | Male                 | Male    | Male      | Male                 | Male               | Female    | Male    |
| <b>Admission season</b>                                                        | Winter               | Winter  | Winter    | Winter               | Spring             | Spring    | Spring  |
| <b>Diagnosis</b>                                                               | Surgical,<br>Cardiac | Medical | Medical   | Surgical,<br>Cardiac | Medical            | Medical   | Medical |
| <b>Mechanical ventilation<sup>a</sup></b>                                      | Yes                  | No      | No        | Yes                  | No                 | Yes       | Yes     |
| <b>PICU length of stay (hours)</b>                                             | 212                  | 151     | 179       | 354                  | 184                | 189       | 289     |
| <b>Survival Status at PICU Discharge</b>                                       | Alive                | Alive   | Alive     | Alive                | Alive              | Alive     | Alive   |
| <b>Received catecholamines</b>                                                 | Yes                  | No      | No        | Yes                  | No                 | Yes       | Yes     |
| <b>Group Assignment</b>                                                        | High Dose            | Placebo | High Dose | High Dose            | Placebo            | High Dose | Placebo |
| <b>Day 3 plasma 25(OH)D concentration, nmol/L (CHEO)</b>                       | 61.1                 | 64.0    | 158.1     | 149.6                | <32.0 <sup>c</sup> | 59.1      | 55.8    |
| <b>Number of doses received<sup>b</sup></b>                                    | 1.5                  | 1.5     | 1         | 1                    | 2                  | 1.5       | 1.5     |
| <b>Day 7 25OHD, nmol/L (Research)</b>                                          | 143.6                | 31.5    | 306.6     | 192.0                | 38.6               | 109.9     | 54.0    |
| <b>Hospital Discharge plasma 25OHD concentration, nmol/L (Clinical Sample)</b> | 99.5                 | 73.3    | 163.5     | 129.3                | 25.0               | 75.0      | 37.0    |

<sup>a</sup>Defined as endotracheal intubation

<sup>b</sup>Based on Day 3 25OHD level; <50 nmol/L = 10000 IU/KG to a maximum of 400000IU; 50-75 nmol/L = 5000 IU/KG to a maximum of 400000IU; > 75 nmol/L = placebo is given

<sup>c</sup>Lower threshold for point of care device is 32.0 nmol/L. Values lower than 32.0 nmol/L reported as <32.0 nmol/L.

**12 patients randomized to 2 dose regimen; 7 patients received 2 doses**
