# Supplementary material for: A phase II dose evaluation pilot feasibility randomized controlled trial of cholecalciferol in critically ill children with vitamin D deficiency (VITdAL-PICU study)
Source: Springer Nature journal article supplement (doi:10.1186/s12887-023-04205-9), 2023-08-14
Supplement: MOESM7 [file 25921372]

**Additional File 7: ANCOVA multivariable models a) including an interaction term and b) without the interaction term.**

**A)**

| Characteristic                                                   | Beta  | 95% CI <sup>1</sup> | p-value |
|------------------------------------------------------------------|-------|---------------------|---------|
| Log(25-OH-D baseline level)                                      | 1.1   | -0.28, 2.6          | 0.11    |
| Treatment Group                                                  |       |                     |         |
| Placebo                                                          | —     | —                   |         |
| Cholecalciferol loading dose group                               | 4.5   | -1.0, 10            | 0.11    |
| log(25-OH-D baseline level) * Cholecalciferol loading dose group | -0.99 | -2.5, 0.55          | 0.2     |

**B)**

| Characteristic                     | Beta | 95% CI <sup>1</sup> | p-value |
|------------------------------------|------|---------------------|---------|
| Log(25-OH-D baseline level)        | 0.29 | -0.23, 0.81         | 0.3     |
| Treatment group                    |      |                     |         |
| Placebo                            | —    | —                   |         |
| Cholecalciferol loading dose group | 0.98 | 0.68, 1.3           | <0.001  |

<sup>1</sup>CI = Confidence Interval.

Footnote: In order to represent the treatment effect on the scale of 25-OH-D it is necessary to exponentiate the beta coefficient above as well as the confidence interval. The result is that the 25-OH-D is estimated to be 2.66 times higher (95% CI: 1.98, 3.56) in the treatment group compared to the placebo group.
