# Supplementary material for: A phase II dose evaluation pilot feasibility randomized controlled trial of cholecalciferol in critically ill children with vitamin D deficiency (VITdAL-PICU study)
Source: Springer Nature journal article supplement (doi:10.1186/s12887-023-04205-9), 2023-08-14
Supplement: MOESM8 [file 25921372]

## Additional File 8: Results of the Outcome Measure Selection Questionnaire

**Part A:** Top Three Outcomes Selected by Forty Families for a Randomized Controlled Trial of Rapid Restoration of Vitamin D Status in Critically Ill Children (n = 40). Families were provided with a list of potential outcomes, as well as an option to specify “Other”, and asked to indicate, other than mortality, the top three outcomes that they would consider important for a research study evaluating rapid restoration of vitamin D status in critically ill children.

| <b>Outcome Measure</b>                                                             | <b>N (%)</b> |
|------------------------------------------------------------------------------------|--------------|
| Your child's overall quality of life and functioning after hospital discharge      | 30 (75.0%)   |
| Time it takes for your child's organs (heart, lungs, kidneys) to function normally | 27 (67.5%)   |
| Your child's pain level after hospital discharge                                   | 17 (42.5%)   |
| Length of stay in the intensive care unit and hospital                             | 16 (40.0%)   |
| Your child's ability to return to school and daily activities                      | 9 (22.5%)    |
| Your child's intelligence after hospital discharge                                 | 6 (15.0%),   |
| Effect of the illness on rest of your family                                       | 4 (10.0%)    |
| Time taken off work for caregiver(s)                                               | 3 (7.5%)     |
| Financial cost of the illness (to the hospital and government)                     | 2 (5.0%)     |
| Financial cost of the illness (for your family)                                    | 1 (2.5%)     |
| Other <sup>a</sup>                                                                 | 4 (10.0%)    |
| No answer selected*                                                                | 2 (5.0%)     |

<sup>a</sup>Other Outcomes indicated by families included: Efficiency of raising vitamin D levels, Readmission to hospital, Overall Recovery Time, and finding answers to child's issues

**Part B:** All Outcomes Selected as Important by Forty Families for a Randomized Controlled Trial of Rapid Restoration of Vitamin D Status in Critically Ill Children (n = 40). Families were provided with a list of potential outcomes, as well as an option to specify “Other”, and asked to indicate, other than mortality, all of the outcomes that they would consider important for a research study evaluating rapid restoration of vitamin D status in critically ill children.

| <b>Outcome Measure</b>                                                             | <b>N (%)</b> |
|------------------------------------------------------------------------------------|--------------|
| Your child's pain level after hospital discharge                                   | 31 (77.5%)   |
| Your child's overall quality of life and functioning after hospital discharge      | 30 (75.0%)   |
| Time it takes for your child's organs (heart, lungs, kidneys) to function normally | 30 (75.0%)   |
| Length of stay in the intensive care unit and hospital                             | 26 (65.0%)   |
| Your child's intelligence after hospital discharge                                 | 24 (60.0%)   |
| Effect of the illness on rest of your family                                       | 21 (52.5%)   |
| Your child's ability to return to school and daily activities                      | 20 (50.0%)   |
| Time taken off work for caregiver(s)                                               | 15 (37.5%)   |
| Financial cost of the illness (for your family)                                    | 15 (37.5%)   |
| Financial cost of the illness (to the hospital and government)                     | 8 (20.0%)    |
| Other <sup>a</sup>                                                                 | 5 (12.5%)    |
| No answer selected*                                                                | 5 (12.5%)    |

<sup>a</sup>Other Outcomes indicated by families included: Length of stay after ICU, Overall recovery time, Complications due to illness, Finding answers, and Readmission to hospital
