# Supplementary material for: A phase II dose evaluation pilot feasibility randomized controlled trial of cholecalciferol in critically ill children with vitamin D deficiency (VITdAL-PICU study)
Source: Springer Nature journal article supplement (doi:10.1186/s12887-023-04205-9), 2023-08-14
Supplement: MOESM9 [file 25921372]

**Additional File 9: Additional Clinical Outcomes**

| <b>Outcome</b>                                          | <b>Treatment<br/>(n=40)</b> | <b>Placebo<br/>(n=19)</b> |
|---------------------------------------------------------|-----------------------------|---------------------------|
| <b>Hypocalcemia in the PICU, frequency (%)</b>          | 16 (40.0)                   | 7 (36.8)                  |
| <b>Total Fluid Intake (ml) Enrollment, median (IQR)</b> | 974.7 (630.0,<br>1686.5)    | 909.0 (470.2,<br>1636.9)  |
| <b>Total Fluid Intake (ml) Day 1, median (IQR)</b>      | 1074.0 (580.2,<br>1543.8)   | 925.3 (521.7,<br>1452.9)  |
| <b>Total Fluid Intake (ml) Day 2, median (IQR)</b>      | 1139.4 (575.1,<br>1508.4)   | 932.0 (494.8,<br>1411.7)  |
| <b>Received PRBCs, frequency (%)</b>                    | 12 (30.0)                   | 8 (42.1)                  |
| <b>Received FFP, frequency (%)</b>                      | 3 (7.5)                     | 2 (10.5)                  |
| <b>Received platelets, frequency (%)</b>                | 7 (17.5)                    | 5 (26.3)                  |
| <b>Received dialysis, frequency (%)</b>                 | 3 (7.5)                     | 1 (5.3)                   |
| <b>Received CRRT, frequency (%)</b>                     | 1 (2.5)                     | 2 (10.5)                  |
